# Supplementary material for: Multiple sclerosis deep grey matter: the relation between demyelination, neurodegeneration, inflammation and iron
Source: PubMed Central journal article supplement — J Neurol Neurosurg Psychiatry. 2014 Jun 4;85(12):1386–95. doi: 10.1136/jnnp-2014-307712 (PMC4251183; doi:10.1136/jnnp-2014-307712), 2014-06-04
Supplement: jnnp-2014-307712-s1.pdf [file jnnp-2014-307712-s1.pdf]

## Supplementary material

**Supplementary Table S1:**

| Clinical disease type | Age | Gender | Total disease duration (months) | Cause of death                                            | Deep grey matter Tissue            |
|-----------------------|-----|--------|---------------------------------|-----------------------------------------------------------|------------------------------------|
| ACMS 1                | 35  | Male   | 1,5                             | Directly MS related                                       | Inactive, Normal appearing         |
| ACMS 2                | 68  | Female | 2                               | Directly MS related                                       | Normal appearing                   |
| ACMS 3                | 69  | Female | 2                               | Directly MS related                                       | Normal appearing                   |
| ACMS 4                | 51  | Female | 5                               | Directly MS related                                       | Active, Inactive, Normal appearing |
| ACMS 5                | 59  | Male   | 5                               | Directly MS related                                       | Inactive, Normal appearing         |
| ACMS 6                | 28  | Male   | 2                               | Directly MS related                                       | Inactive, Normal appearing         |
| RRMS 1                | 35  | Female | 108                             | Unavailable                                               | Inactive, Normal appearing         |
| RRMS 2                | 39  | Female | 120                             | Unavailable                                               | Inactive, Normal appearing         |
| RRMS 3                | 69  | Female | 108                             | Unavailable                                               | Inactive, Normal appearing         |
| RRMS 4                | 58  | Male   | 120                             | Unavailable                                               | Inactive, Normal appearing         |
| RRMS 5                | 57  | Female | 156                             | Cardiovascular failure under peripheral septic conditions | Inactive, Normal appearing         |
| RRMS 6                | 44  | Female | 262                             | Pulmonary Embolism                                        | Inactive, Normal appearing         |
| RRMS 7                | 56  | Female | Unavailable                     | Unavailable                                               | Inactive, Normal appearing         |
| SPMS 1                | 66  | Female | 96                              | Pneumonia / Aspiration Pneumonia                          | Inactive, Normal appearing         |
| SPMS 2                | 41  | Male   | 137                             | Myocardial Infarction                                     | Active, Inactive, Normal appearing |
| SPMS 3                | 60  | Male   | 234                             | Respiratory failure                                       | Inactive, Normal appearing         |
| SPMS 4                | 53  | Female | 241                             | Pneumonia / Aspiration Pneumonia                          | Active, Inactive, Normal appearing |
| SPMS 5                | 56  | Female | 408                             | Drowning in bath tube                                     | Inactive, Normal appearing         |
| SPMS 6                | 46  | Female | 444                             | Cardiovascular failure under peripheral septic conditions | Active, Inactive, Normal appearing |
| SPMS 7                | 70  | Female | 120                             | Unavailable                                               | Inactive, Normal appearing         |
| SPMS 8                | 31  | Female | 132                             | Unavailable                                               | Inactive, Normal appearing         |
| SPMS 9                | 62  | Female | 144                             | Pneumonia / Aspiration Pneumonia                          | Inactive, Normal appearing         |
| SPMS 10               | 69  | Female | 170                             | Pneumonia / Aspiration Pneumonia                          | Normal appearing                   |
| SPMS 11               | 45  | Female | 240                             | Cardiovascular failure under peripheral septic conditions | Inactive, Normal appearing         |
| SPMS 12               | 84  | Female | 264                             | Pulmonary Embolism                                        | Inactive, Normal appearing         |
| SPMS 13               | 64  | Female | 336                             | Cardiovascular failure under peripheral septic conditions | Inactive, Normal appearing         |
| SPMS 14               | 56  | Male   | 372                             | Cardiovascular failure under peripheral septic conditions | Active, Inactive, Normal appearing |
| SPMS 15               | 78  | Female | 372                             | Pulmonary Embolism                                        | Inactive, Normal appearing         |
| SPMS 16               | 76  | Male   | 372                             | Cardiovascular failure under peripheral septic conditions | Inactive, Normal appearing         |
| SPMS 17               | 69  | Female | 384                             | Cardiovascular failure under peripheral septic conditions | Normal appearing                   |
| SPMS 18               | 73  | Male   | 408                             | Cardiovascular failure under peripheral septic conditions | Inactive, Normal appearing         |
| SPMS 19               | 81  | Female | 432                             | Cardiovascular failure under peripheral septic conditions | Inactive, Normal appearing         |
| SPMS 20               | 59  | Female | 492                             | Cardiovascular failure under peripheral septic conditions | Inactive, Normal appearing         |
| SPMS 21               | 59  | Female | 72                              | Unavailable                                               | Inactive                           |

|                  |    |        |     |                                                              |                               |
|------------------|----|--------|-----|--------------------------------------------------------------|-------------------------------|
| SPMS 22          | 54 | Female | 168 | Unavailable                                                  | Inactive,<br>Normal appearing |
| SPMS 23          | 43 | Male   | 192 | Unavailable                                                  | Inactive,<br>Normal appearing |
| PPMS 1           | 52 | Female | 30  | Cardiovascular failure under<br>peripheral septic conditions | Inactive,<br>Normal appearing |
| PPMS 2           | 55 | Female | 60  | Pulmonary Embolism                                           | Inactive,<br>Normal appearing |
| PPMS 3           | 67 | Male   | 87  | Cardiovascular failure under<br>peripheral septic conditions | Inactive,<br>Normal appearing |
| PPMS 4           | 56 | Female | 132 | Adult respiratory distress syndrome                          | Inactive,<br>Normal appearing |
| PPMS 5           | 34 | Female | 204 | Cardiovascular failure under<br>peripheral septic conditions | Inactive                      |
| PPMS 6           | 38 | Female | 336 | Unavailable                                                  | Inactive,<br>Normal appearing |
| PPMS 7           | 83 | Female | 360 | Cardiovascular failure under<br>peripheral septic conditions | Normal appearing              |
| PPMS 8           | 75 | Female | 372 | Pulmonary Embolism                                           | Inactive,<br>Normal appearing |
| PPMS 9           | 64 | Female | 204 | Unavailable                                                  | Inactive                      |
| PPMS 10          | 73 | Female | 411 | Myocardial infarction                                        | Inactive,<br>Normal appearing |
| PPMS 11          | 75 | Female | 314 | Unavailable                                                  | Inactive,<br>Normal appearing |
| Progressive MS 1 | 66 | Female | 120 | Cardiovascular failure under<br>peripheral septic conditions | Normal appearing              |
| Subclinical MS 1 | 66 | Female | -   | Cardiovascular failure under<br>peripheral septic conditions | Normal appearing              |
| Subclinical MS 2 | 69 | Female | -   | Cardiovascular failure under<br>peripheral septic conditions | Normal appearing              |
| Benign MS 1      | 72 | Female | -   | Systemic malignancy                                          | Inactive,<br>Normal appearing |
| Control 1        | 30 | Female | -   | Cardiovascular failure under<br>peripheral septic conditions | Control tissue                |
| Control 2        | 36 | Female | -   | Myocardial Infarction                                        | Control tissue                |
| Control 3        | 37 | Male   | -   | Pulmonary Embolism                                           | Control tissue                |
| Control 4        | 39 | Female | -   | Cardiovascular failure under<br>peripheral septic conditions | Control tissue                |
| Control 5        | 45 | Female | -   | Myocardial Infarction                                        | Control tissue                |
| Control 6        | 46 | Male   | -   | Cardiovascular failure under<br>peripheral septic conditions | Control tissue                |
| Control 7        | 65 | Male   | -   | Hemoptysis                                                   | Control tissue                |
| Control 8        | 70 | Male   | -   | Renal failure                                                | Control tissue                |
| Control 9        | 71 | Female | -   | Pulmonary Embolism                                           | Control tissue                |
| Control 10       | 71 | Female | -   | cardiovascular failure under<br>peripheral septic conditions | Control tissue                |
| Control 11       | 83 | Male   | -   | Systemic malignancy                                          | Control tissue                |
| Control 12       | 97 | Female | -   | Pneumonia / Aspiration Pneumonia                             | Control tissue                |

**Supplementary Table S1:** Supplementary Table S1 depicts detailed clinical data of 12 controls and 51 MS patients of whom DGM tissue was available for analysis. Subclinical MS (n = 2) was diagnosed when a routine autopsy revealed multiple sclerosis pathology in patients with no clinical history of neurodegenerative disease. Benign multiple sclerosis (n = 1) was diagnosed when, after 10 years of disease, the EDSS score was below or equal to 3. One MS case was diagnosed with progressive MS but could not be further classified.

Acute MS patients = ACM; Relapsing/remitting multiple sclerosis = RRMS; Secondary progressive multiple sclerosis = SPMS; Primary progressive multiple sclerosis = PPMS

### Supplementary Table S2

| Patients                           | Anatomical structure |               |         |                 |                 |
|------------------------------------|----------------------|---------------|---------|-----------------|-----------------|
|                                    | Internal capsule     | Insula cortex | Putamen | Caudate nucleus | Globus pallidus |
| n (MS patients)                    | 25                   | 14            | 29      | 20              | 23              |
| n (MS patients, histo blocks)      | 30                   | 15            | 38      | 25              | 28              |
| n (Control patients)               | 12                   | 7             | 11      | 10              | 9               |
| n (Control patients, histo blocks) | 14                   | 7             | 12      | 11              | 9               |

**Supplementary Table S2:** Supplementary Table S2 depicts the number of multiple sclerosis (MS), control patients and respective tissue blocks, included in the subanalysis on routine sections for inflammation, iron, oxidative stress and neurodegeneration, separated by anatomical structures.

### Supplementary Table S3

|                             | Perivascular cuffs |            |            |
|-----------------------------|--------------------|------------|------------|
|                             | none               | few 1-10   | many >10   |
| <b>Active DGM lesions</b>   | 1<br>20.0%         | 3<br>60.0% | 1<br>20.0% |
| <b>Inactive DGM lesions</b> | 32<br>84.2%        | 5<br>13.2% | 1<br>2.6%  |
| <b>Normal appearing DGM</b> | 8<br>100.0%        | 0<br>0.0%  | 0<br>0.0%  |
| <b>Total DGM</b>            | 41<br>80.4%        | 8<br>15.7% | 2<br>3.9%  |

### Supplementary Table S3: Evaluation of perivascular cuffs in the DGM of patients with multiple sclerosis

Supplementary Table S3 shows data on the evaluation of the perivascular accumulation of inflammatory cells (cuffs) in the DGM of patients with multiple sclerosis. The values represent the total number and percentage. The data are pooled for total DGM so that one value per patient is given (n = 51). Each patient was categorised as having DGM with active lesions, DGM with inactive lesions, or non-lesioned DGM. The patients with active demyelinating DGM lesions present with significantly more perivascular inflammatory cuffs compared to patients with only inactive DGM lesions or patients with multiple sclerosis without DGM lesions (p = 0.007; p = 0.007, respectively).

**Supplementary Figure S1: CD3 positive parenchymal and perivascular T-cell infiltration is present in active deep grey matter lesions**

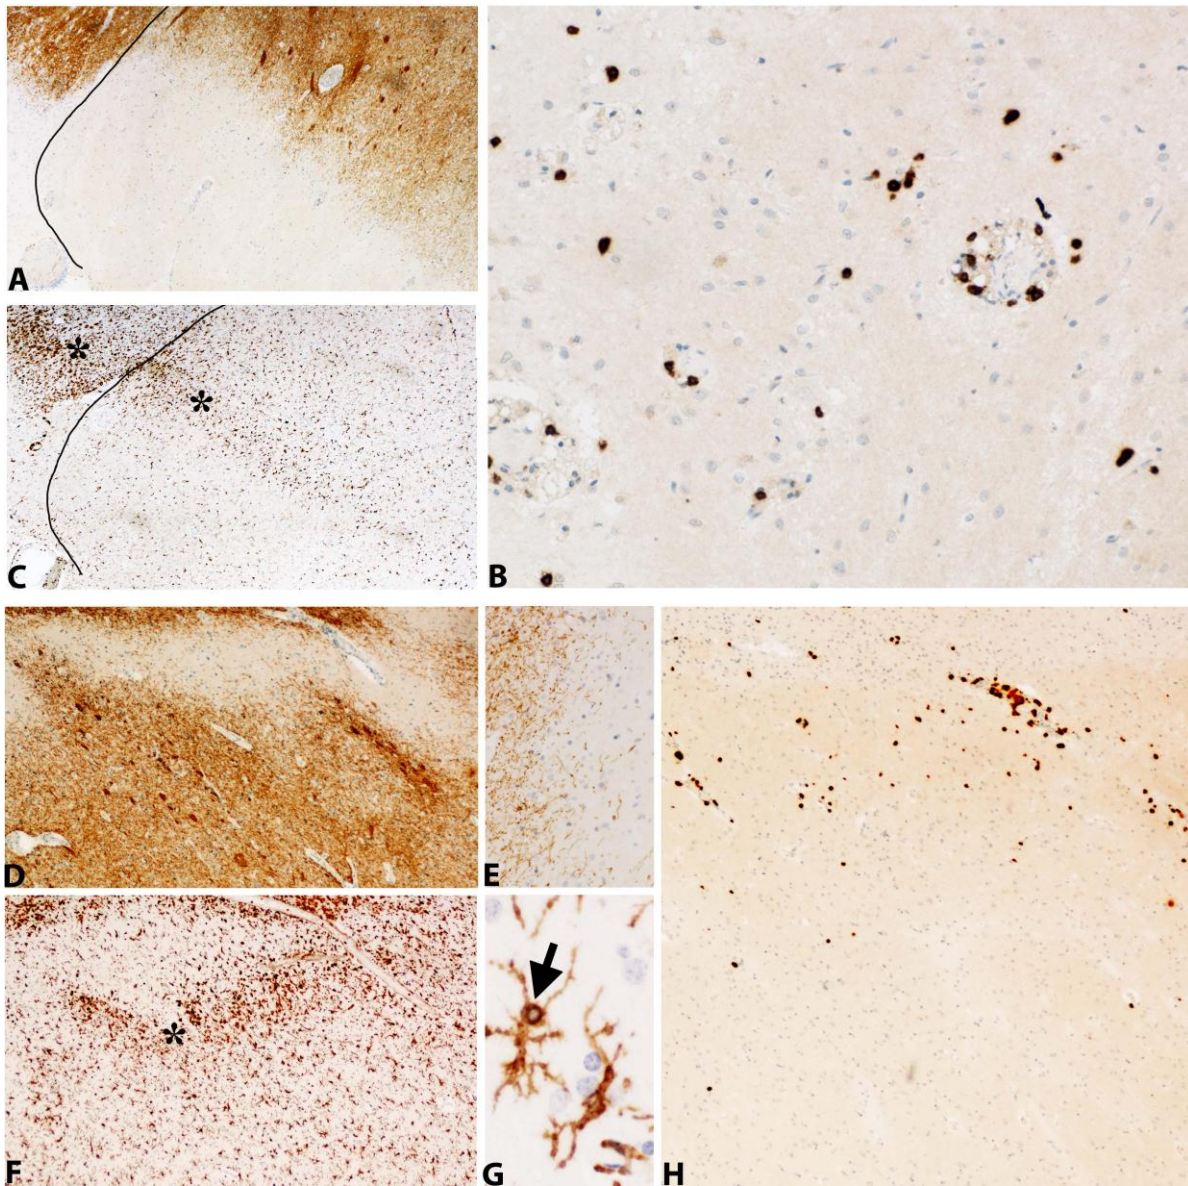

Supplementary Figure S1 depicts stainings derived from brains of two MS patients. The first subject is a 41-year-old male SPMS patient with 137 months disease duration (A-C). The second subject is a 46-year-old female SPMS patient with 444 months disease duration (D-H). A: Proteolipid protein (PLP) staining of an active deep grey matter lesion in the caudate nucleus.

B: CD3-positive T-cells are found both in the parenchyma and perivascular spaces in the active deep grey matter lesion.

C: p22-phox staining shows increased density of immunoreactive, activated microglia/macrophages at the expanding lesion edge (asterisk). Note the sharp decrease in p22-phox reactivity at the white matter / deep grey matter border, which is indicated by the black line.

D, E: PLP staining of an active deep grey matter lesion in the caudate nucleus at different magnifications. E: Lesion boarder

F: p22-phox immunoreactivity shows activated microglia/macrophages at the expanding lesion edge (asterisk).

G: Higher magnification of p22-phox immunoreactive activated microglia (arrow) in the DGM lesion.

H: CD-3-positive T-cells are found in perivascular spaces and in the parenchyma.

## Supplementary Figure S2: Diffuse DGM neuronal loss is predictive of clinical status

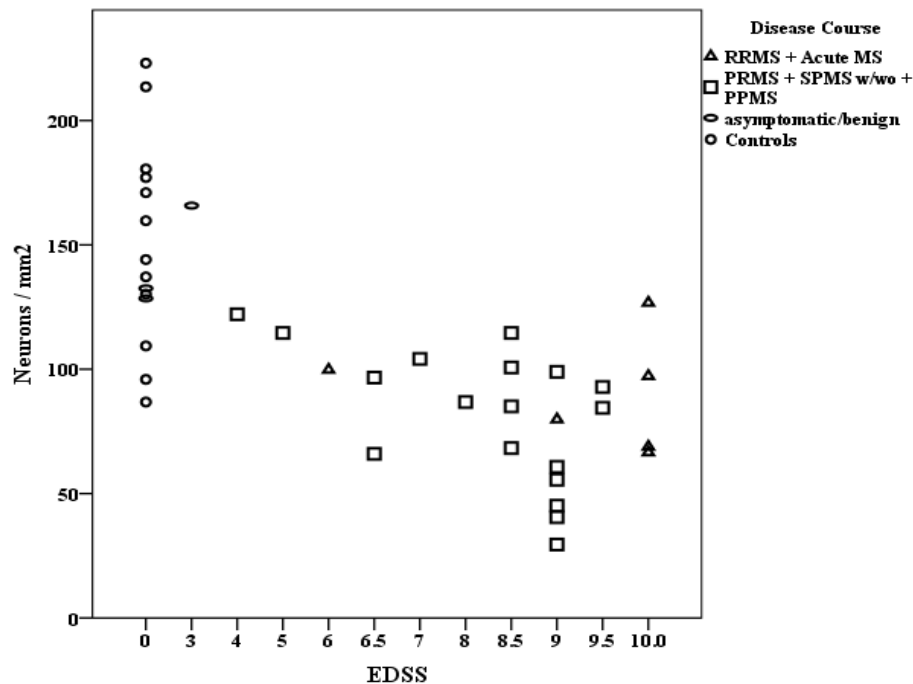

Supplementary Figure S2 shows that the EDSS negatively correlates with neuronal density in the NADGM of patients with multiple sclerosis ( $r = -0.5$ ;  $p = 0.004$ ). The presented multiple sclerosis cases include patients of all disease courses: acute multiple sclerosis, relapsing/remitting multiple sclerosis, progressive-relapsing multiple sclerosis, secondary progressive multiple sclerosis and primary progressive multiple sclerosis as well as benign/subclinical multiple sclerosis. For reasons of graphical visualisation, the neuronal densities of control patients are included in the scatter diagram at an EDSS of zero. It is important to note that these values are not included in the Spearman correlation analysis. In order to obtain these data, neurons identified by the presence of a prominent nucleolus in HE staining were manually counted in 10 visual fields ( $\approx 0.0576 \text{ mm}^2$ )/normal-appearing putamen and 10 visual fields/normal-appearing caudate nucleus, in both multiple sclerosis and control patients. The mean neuronal density values were calculated per patient. Spearman's correlation analysis was used for the statistical evaluation.
